# Supplementary material for: Seminiferous tubule–inspired coaxial bioprinting–derived extracellular vesicles restore Leydig cell steroidogenesis by restraining Wnt4/β-catenin signaling
Source: Research Square preprint supplement (doi:10.21203/rs.3.rs-8836594/v1), 2026-02-17
Supplement: Supplementary file 1 [file b0ca263a8ecb8809313b3428.docx]

Supplementary Table 1. Primers for Quantitative Real-time PCR.

| Gene | Forward Primer (5’ – 3’) | Reverse Primer (5’ – 3’) |
| --- | --- | --- |
| Mus-StAR | CCGGAGCAGAGTGGTGTCA | CAGTGGATGAAGCACCATGC |
| Mus-CYP11A1 | CACTGAGACTCCACCCCATC | GGCAAAGCTAGCCACCTGTA |
| Mus-HSD3β2 | AGCTCTGGACAAAGTATTCCGA | GCCTCCAATAGGTTCTGGGT |
| Mus-GAPDH | GTCTTCACTACCATGGAGAAGG | TCATGGATGACCTTGGCCAG |
| Mus-Wnt4 | CGAGCAATTGGCTGTACCTG | GGGAGTCCAGTGTGGAACAG |
| Mus-Wnt7b | ATCCTACTATGTGTCGCCCG | CACGGATGACAATGCTCTGTAAG |
| Mus-Wnt9a | GGTGGGCAAGCACCTAAAAC | GTACAAGCTCTGGTGTTCGGG |
| Mus-Ctbp2 | GTCCCTACTGAGAACAGCACG | CTCAGCAGGGCCAAAAACTC |
| Mus-Axin2 | ATGAGTAGCGCCGTGTTAGTG | GGGCATAGGTTTGGTGGACT |
| Mus-Myc | GTTGGAAACCCCGCAGACAG | ATAGGGCTGTACGGAGTCGT |
| Mus-PPARD | GCAGCCTCAACATGGAATGTC | GAGCTTCATGCGGATTGTCC |

Supplementary Table 2. Si-Wnt4 sequence.

| Gene | Si-Wnt4 sequence |
| --- | --- |
| Si-Wnt4-A | F: 5’-ACGUGCAACAAGACAUCUAAATT-3’  R: 3’-UUUAGAUGUCUUGUUGCACGUTT-5’ |
| Si-Wnt4-B | F: 5’-AGACGUGCGAGAAACUCAAAGTT-3’  R: 3’-CUUUGAGUUUCUCGCACGUCUTT-5’ |
| Si-Wnt4-C | F: 5’-ACGCGCUAAAGGAGAAGUUUGTT-3’  R: 3’-CAAACUUCUCCUUUAGCGCGUTT-5’ |
| Si-NC | F: 5’-UUCUCCGAACGUGUCACGUTT-3’  R: 3’-TAAGAGGCUUGCACAGUGCA-5’ |
